# Supplementary material
Source: publisher figshare collection journal article supplement (https://acs.figshare.com/ndownloader/files/32085425)
Supplement: Supplementary file 1 [file 32085425]

**Supporting Information**

**Ovotransferrin Antibacterial Peptide Coupling  
Mesoporous Silica Nanoparticle as An Effective  
Antibiotic Delivery System for Treating Bacterial  
Infection *In Vivo***

Bin Ma <sup>a</sup>, Yue Chen <sup>a</sup>, Gan Hu <sup>a</sup>, Qi Zeng <sup>a</sup>, Xiaohui Lv <sup>a</sup>, Deog Hwan Oh <sup>b</sup>, Xing Fu <sup>a, \*</sup>,  
Yongguo Jin <sup>a, \*</sup>

<sup>a</sup> National Research and Development Center for Egg Processing, College of Food  
Science and Technology, Huazhong Agricultural University, Wuhan, Hubei 430070, PR  
China

<sup>b</sup> Department of Bioconvergence Science and Technology, College of Agriculture  
and Life Science, Kangwon National University, Chuncheon, South Korea

\* Corresponding author:

Dr. Yongguo Jin

College of Food Science and Technology, Huazhong Agricultural University, Wuhan,  
Hubei 430070, PR China

Tel and Fax: +86 27 87283177; E-mail address: jinyongguo@mail.hzau.edu.cn

Dr. Xing Fu

College of Food Science and Technology, Huazhong Agricultural University, Wuhan,  
Hubei 430070, PR China

Tel and Fax: +86 27 87283177; E-mail address: fuxing@mail.hzau.edu.cn

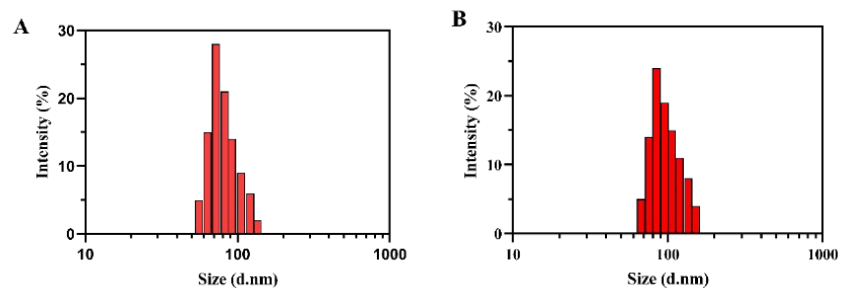

**Figure S1.** The size distribution of MSNs@Gen (A) and MSNs@OVTp12@Gen (B).

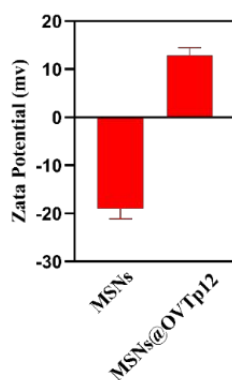

**Figure S2.** The zeta potential of MSNs and MSNs@OVTp12

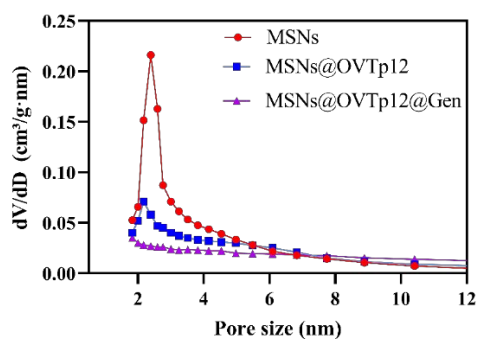

**Figure S3.** The pore-size distribution for MSNs, MSNs@OVTp12 and MSNs@OVTp12@Gen.

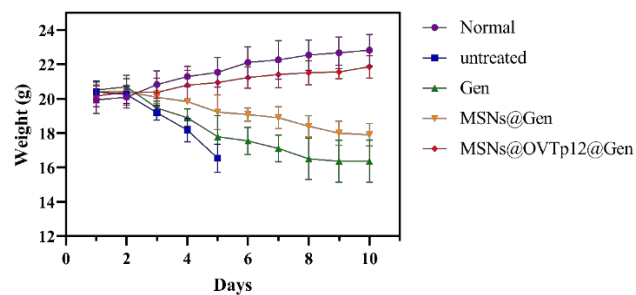

**Figure S4.** Body weight of infected mice as a function of time during treatment by Gen, MSNs@Gen and MSNs@OVTp12@Gen

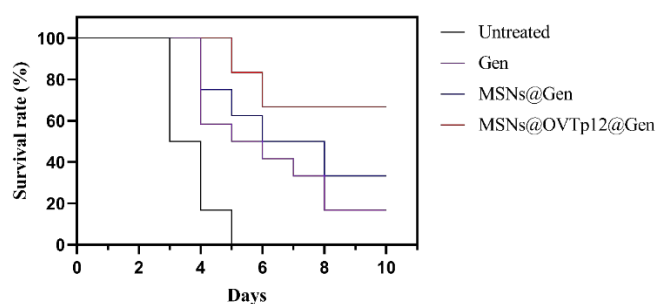

**Figure S5.** The survival rate of infected mice as a function of time during treatment by Gen, MSNs@Gen and MSNs@OVTp12@Gen.

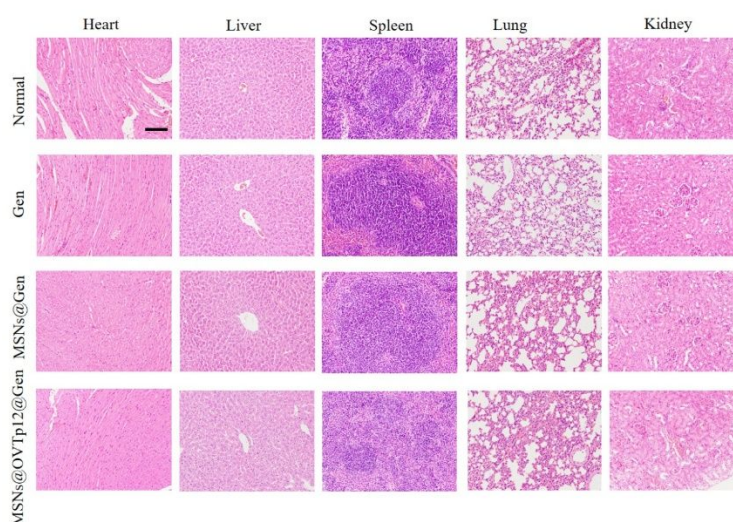

**Figure S6.** Histopathological examinations of different treated groups in main organs.

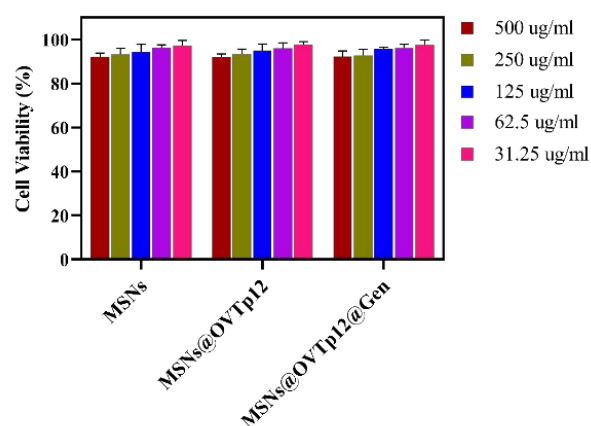

**Figure S7.** Cell viability of RAW264.7 cells incubated for 24 h with different concentrations of MSNs, MSNs@OVTp12 and MSNs@OVTp12@Gen.

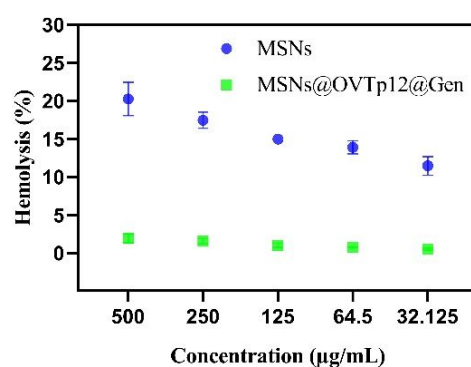

**Figure S8.** Hemolytic percentage of RBCs incubated with MSNs and MSNs@OVTp12@Gen at different concentrations.
